# Supplementary material for: Selecting Superior De Novo Transcriptome Assemblies: Lessons Learned by Leveraging the Best Plant Genome
Source: PLoS One. 2016 Jan 5;11(1):e0146062. doi: 10.1371/journal.pone.0146062 (PMC4701411; doi:10.1371/journal.pone.0146062)
Supplement: S1 File — The change in each category is indicated in a shaded field with a delta sign, i.e. Mosaik-S Δ. (XLSX) [file pone.0146062.s016.xlsx]

## Sheet: Legend
S1 File.
This file contains statistics for primary and post processed assemblies of BR1, BR2, BR12, and NORM datasets. The change in each category is indicated in a shaded field with a delta sign, i.e. Mosaik-S ∆.

## Sheet: BR1
	Mismatch rate	Mismatch %	Alignment gap rate	Alignment Gap %	Coverage gap #	ISO #	Conflict #	TypeII rate	TypeII %	Count	N50 Mbp	N-content	No hit	>90% coverage #	>1.5 BS #	Median length	N50 Length	RNA-Seq Spearman's	Mappable reads
Mosaik	0.000941	0.0941	6e-06	0.0006	17264	59	262	0.000382226	0.0382226	20930	15.5666	1771804	4583	12296	12483	1326	1838	1	35753440
Mosaik-S	0.000934	0.0934	6e-06	0.0006	16931	56	256	0.000247795	0.0247795	20178	15.4032	1707111	5336	12157	12298	1361	1848	1	35393822
Mosaik-S ∆	-0.743889	-0.743889	0	0	-1.92887	-5.08475	-2.29008	-35.1707	-35.1707	-3.59293	-1.04973	-3.65125	16.4303	-1.13045	-1.48202	2.63952	0.54407	0	-1.00583
Inchworm	0.010011	1.0011	0.000205	0.0205	14061	6120	8691	0.000751503	0.0751503	51896	21.8271	0	6705	10449	9340	435	1622	0.95	40404658
Inchworm-S	0.004881	0.4881	6.9e-05	0.0069	12296	5285	4457	0.000315983	0.0315983	34812	15.7605	0	7370	9491	9030	584	1560	0.95	40007750
Inchworm-S ∆	-51.2436	-51.2436	-66.3415	-66.3415	-12.5525	-13.6438	-48.7171	-57.9532	-57.9532	-32.9197	-27.7941	0	9.91797	-9.16834	-3.31906	34.2529	-3.82244	0	-0.982332
Trinity-ICB	0.001563	0.1563	4.4e-05	0.0044	11700	5274	1435	0.00016619	0.016619	30086	13.2526	0	7985	8769	8626	543	1552	0.9	37636756
Trinity-ICB ∆	-84.3872	-84.3872	-78.5366	-78.5366	-16.7911	-13.8235	-83.4887	-77.8856	-77.8856	-42.0264	-39.2839	0	19.0902	-16.0781	-7.64454	24.8276	-4.31566	-5.26316	-6.85045
CLC	0.005577	0.5577	0.000133	0.0133	16463	7987	11055	0.00234516	0.234516	161183	22.038	7022	6213	10363	8392	135	578	0.96	32373112
CLC-S	0.003038	0.3038	7.1e-05	0.0071	13763	5637	7819	0.00264272	0.264272	81734	16.6297	179	6881	8757	8310	153	1114	0.96	33191838
CLC-S ∆	-45.5263	-45.5263	-46.6165	-46.6165	-16.4004	-29.4228	-29.2718	12.6882	12.6882	-49.2912	-24.5405	-97.4509	10.7516	-15.4974	-0.977121	13.3333	92.7336	0	2.52903
CLCscaf	0.001	0.1	0	0	14450	7859	3911	0.000804448	0.0804448	42265	14.725	47268	6883	9880	8775	313	1421	0.948771	34331292
CLCscaf-S	0.001	0.1	0	0	12295	5045	3048	0.000278724	0.0278724	32290	13.697	1809	7510	8903	8920	509	1511	0.948739	34194284
CLCscaf-S ∆	0	0	0	0	-14.9135	-35.8061	-22.066	-65.3521	-65.3521	-23.6011	-6.98132	-96.1729	9.1094	-9.88866	1.65242	62.6198	6.33357	-0.00338009	-0.399076
Velvet	0.004326	0.4326	0.000135	0.0135	11145	2225	7521	0.000829831	0.0829831	37357	17.8462	12748	8445	7918	8395	629	1582	0.93	17672254
Velvet-S	0.002611	0.2611	7.2e-05	0.0072	9590	2483	3562	0.000374434	0.0374434	26707	13.4044	147	9058	7370	7966	729	1561	0.91	17015386
Velvet-S ∆	-39.644	-39.644	-46.6667	-46.6667	-13.9524	11.5955	-52.6393	-54.8783	-54.8783	-28.5087	-24.8894	-98.8469	7.25873	-6.92094	-5.11018	15.8983	-1.32743	-2.15054	-3.71695
Oases-VO	0.001302	0.1302	5.4e-05	0.0054	8964	2492	1381	0.000444385	0.0444385	22503	11.359	122	10263	6423	7148	722	1579	0.82	14005400
Oases-VO ∆	-69.9029	-69.9029	-60	-60	-19.5693	12	-81.6381	-46.4487	-46.4487	-39.7623	-36.3503	-99.043	21.5275	-18.881	-14.8541	14.7854	-0.189633	-11.828	-20.7492
SOAPtrans	0.002	0.2	0	0	21064	3691	2782	0.00064798	0.064798	37469	15.114	515984	7215	8930	7397	426	1557	0.932582	32831496
SOAPtran-S	0.001143	0.1143	7.9e-05	0.0079	18095	2727	706	0.000506879	0.0506879	27620	13.229	402496	8116	8083	7166	662	1622	0.908867	31781356
SOAPtrans-S ∆	-42.85	-42.85	nominal increase	nominal increase	-14.0951	-26.1176	-74.6226	-21.7755	-21.7755	-26.2857	-12.4719	-21.9945	12.4879	-9.48488	-3.12289	55.3991	4.17469	-2.54289	-3.19857
SOAPdenovo	0.000991	0.0991	5.3e-05	0.0053	20743	4450	3939	0.000269439	0.0269439	44537	14.0932	304230	6770	7771	6212	289	1322	0.87	12403048
SOAPdenovo-S	0.000937	0.0937	4.7e-05	0.0047	14872	3557	3270	6.15101e-05	0.00615101	32515	12.8559	10040	7907	7009	6707	472	1427	0.84	12667558
SOAPdenovo-S ∆	-5.44904	-5.44904	-11.3208	-11.3208	-28.3035	-20.0674	-16.984	-77.171	-77.171	-26.9933	-8.77954	-96.6999	16.7947	-9.80569	7.96845	63.3218	7.94251	-3.44828	2.13262
ABySS	0.001473	0.1473	4.4e-05	0.0044	12451	1473	2523	0.000528877	0.0528877	28362	12.583	1026	8737	5860	7625	601	1474	0.92	17361412
ABySS-S	0.001399	0.1399	3.7e-05	0.0037	10715	1227	2139	0.000441235	0.0441235	24930	12.1025	15	9267	5566	7542	717	1507	0.91	17010492
ABySS-S ∆	-5.02376	-5.02376	-15.9091	-15.9091	-13.9427	-16.7006	-15.22	-16.5712	-16.5712	-12.1007	-3.81882	-98.538	6.06616	-5.01706	-1.08852	19.3012	2.23881	-1.08696	-2.02126
NG IT	0.001061	0.1061	3.7e-05	0.0037	9486	2506	1555	0.000828603	0.0828603	24137	10.5079	0	10675	4957	6632	602	1326	0.93	41166420
NG IT-S	0.00101	0.101	3.4e-05	0.0034	8990	2305	1232	0.000702278	0.0702278	22783	10.2374	0	10934	4813	6576	640	1344	0.93	40872820
NG IT-S ∆	-4.80679	-4.80679	-8.10811	-8.10811	-5.22876	-8.02075	-20.7717	-15.2456	-15.2456	-5.60964	-2.57478	0	2.42623	-2.90498	-0.844391	6.31229	1.35747	0	-0.713203
NG MO	0.000951	0.0951	3e-05	0.003	14064	3272	3092	0.000161917	0.0161917	30880	7.1214	0	12976	2031	3547	232	877	0.88	37812832
NG MO-S	0.000935	0.0935	2.8e-05	0.0028	12670	2830	2492	3.57513e-05	0.00357513	27971	6.84785	0	13217	1928	3540	255	912	0.88	36630124
NG MO-S ∆	-1.68244	-1.68244	-6.66667	-6.66667	-9.91183	-13.5086	-19.4049	-77.92	-77.92	-9.42034	-3.84125	0	1.85727	-5.07139	-0.19735	9.91379	3.99088	0	-3.1278
ABySS Multi-K	0.013025	1.3025	0.000314	0.0314	11075	171	27895	0.00177321	0.177321	294382	61.2335	21326	7897	8315	NA	133	1181	NA
ABySS Multi-K-S	0.004161	0.4161	0.000109	0.0109	10106	190	26462	0.00167624	0.167624	88293	29.8019	271	8369	7677		312	1408
ABySS Multi-K-S ∆	-68.0537	-68.0537	-65.2866	-65.2866	-8.74944	11.1111	-5.13712	-5.46858	-5.46858	-70.0073	-51.3307	-98.7293	5.97695	-7.67288		134.586	19.221
CLC HYBRID	0.00615	0.615	0.000158	0.0158	16413	7885	11547	0.00462389	0.462389	153983	25.785	64404	6226	10457		182	474
CLC HYBRID-S	0.002718	0.2718	7.6e-05	0.0076	13728	5548	7504	0.00275504	0.275504	63520	16.3138	2046	6912	8988		232	1174
CLC HYBRID-S ∆	-55.8049	-55.8049	-51.8987	-51.8987	-16.359	-29.6386	-35.0134	-40.4173	-40.4173	-58.7487	-36.7316	-96.8232	11.0183	-14.048		27.4725	147.679
CLC CAP3	0.002775	0.2775	8.3e-05	0.0083	16462	8009	9777	0.00345423	0.345423	71217	16.6049	6396	6249	10303		185	1128
CLC CAP3-S	0.002159	0.2159	6.1e-05	0.0061	13757	5654	6677	0.00321955	0.321955	48454	14.7665	148	6920	8815		271	1297
CLC CAP3-S ∆	-22.1982	-22.1982	-26.506	-26.506	-16.4318	-29.4044	-31.7071	-6.79407	-6.79407	-31.9629	-11.0717	-97.6861	10.7377	-14.4424		46.4865	14.9823

## Sheet: BR2
	Mismatch rate	Mismatch %	Alignment gap rate	Alignment Gap %	Coverage gap #	ISO #	Conflict #	TypeII rate	TypeII %	Count	N50Mbp	N-content	No hit	>90% coverage #	>1.5 BS #	Median length	N50 Length	RNA-Seq Spearman's	Mappable reads
Mosaik	0.001034	0.1034	5e-06	0.0005	17986	68	258	0.000192234	0.0192234	20808	15.66	1724871	4708	12727	12692	1339	1842	1	26994412
Mosaik-S	0.001019	0.1019	3e-06	0.0003	17548	65	242	9.97456e-05	0.00997456	20051	15.48	1643382	5364	12573	12500	1374	1851	1	26566854
Mosaik-S ∆	-1.45068	-1.45068	-40	-40	-2.43523	-4.41176	-6.20155	-48.1123	-48.1123	-3.63802	-1.14943	-4.72435	13.9337	-1.21003	-1.51276	2.61389	0.488599	0	-1.58388
Inchworm	0.013183	1.3183	0.000347	0.0347	14299	6626	11181	0.000547854	0.0547854	60235	23.72	0	6769	10665	8849	373	1608	0.95	31047148
Inchworm-S	0.005297	0.5297	6.4e-05	0.0064	12096	5565	5949	0.000245098	0.0245098	36720	15.66	0	7515	9420	8512	521	1514	0.94	30704748
Inchworm-S ∆	-59.8195	-59.8195	-81.5562	-81.5562	-15.4067	-16.0127	-46.7937	-55.2622	-55.2622	-39.0388	-33.9798	0	11.0208	-11.6737	-3.80834	39.6783	-5.84577	-1.05263	-1.10284
Trinity-ICB	0.002132	0.2132	4.1e-05	0.0041	11565	5586	3111	0.000155666	0.0155666	32120	13.22	0	8077	8703	8107	437	1502	0.9	28655620
Trinity-ICB ∆	-83.8277	-83.8277	-88.1844	-88.1844	-19.1202	-15.6957	-72.176	-71.5862	-71.5862	-46.6755	-44.2664	0	19.3234	-18.3966	-8.38513	17.1582	-6.59204	-5.26316	-7.70289
CLC	0.001815	0.1815	7e-05	0.007	18633	12435	9228	0.00222241	0.222241	84143	16	2166	6824	9444	6805	156	890	0.96	25130870
CLC-S	0.00134	0.134	4.4e-05	0.0044	15035	8876	6214	0.00164148	0.164148	53001	13.7	68	7540	7666	6786	219	1125	0.96	25912196
CLC-S ∆	-26.1708	-26.1708	-37.1429	-37.1429	-19.3098	-28.6208	-32.6615	-26.1396	-26.1396	-37.0108	-14.375	-96.8606	10.4924	-18.8268	-0.279206	40.3846	26.4045	0	3.10903
Velvet	0.00467	0.467	0.000157	0.0157	11333	2580	7558	0.00087708	0.088	38765	18.56	14272	8622	8024	8162	634	1582	0.93	15625662
Velvet-S	0.002876	0.2876	8.1e-05	0.0081	9680	2861	3537	0.000560015	0.056	26785	13.56	491	9225	7395	7597	746	1558	0.92	14974550
Velvet-S ∆	-38.4154	-38.4154	-48.4076	-48.4076	-14.5857	10.8915	-53.2019	-36.1501	-36.1501	-30.9042	-26.9397	-96.5597	6.99374	-7.83898	-6.92232	17.6656	-1.51707	-1.07527	-4.16694
Oases-VO	0.001449	0.1449	5.9e-05	0.0059	8979	2827	1207	0.000449924	0.0449924	22226	11.26	384	10522	6378	6734	730	1576	0.81	11819332
Oases-VO ∆	-68.9722	-68.9722	-62.4204	-62.4204	-20.7712	9.57364	-84.0302	-48.7021	-48.7021	-42.6648	-39.3319	-97.3094	22.0367	-20.5135	-17.4957	15.142	-0.379267	-12.9032	-24.3595
SOAPdenovo	0.001011	0.1011	4.4e-05	0.0044	21496	4159	3341	0.000402019	0.0402019	44774	13.94	284386	7001	7712	6183	285	1307	0.86	9807218
SOAPdenovo-S	0.000977	0.0977	3.7e-05	0.0037	15180	3665	2765	0.000314614	0.0314614	31785	12.64	33573	8136	6997	6462	472	1433	0.83	9808830
SOAPdenovo-S ∆	-3.36301	-3.36301	-15.9091	-15.9091	-29.3822	-11.8779	-17.2403	-21.7416	-21.7416	-29.0101	-9.32568	-88.1946	16.212	-9.27127	4.51237	65.614	9.6404	-3.48837	0.0164369
ABySS	0.001452	0.1452	4.9e-05	0.0049	14466	1717	2715	0.000992858	0.0992858	31223	13.02	4542	8461	6404	7341	520	1459	0.89	12028064
ABySS-S	0.001373	0.1373	4.7e-05	0.0047	11886	1419	2321	0.000802906	0.0802906	26155	12.38	150	9248	6038	7277	679	1509	0.87	11718122
ABySS-S ∆	-5.44077	-5.44077	-4.08163	-4.08163	-17.8349	-17.3559	-14.512	-19.1319	-19.1319	-16.2316	-4.91551	-96.6975	9.3015	-5.71518	-0.871816	30.5769	3.427	-2.24719	-2.57682
NG IT	0.001169	0.1169	3.4e-05	0.0034	11782	4836	2111	0.000835087	0.0835087	29937	9.72	7214	11000	3904	4676	407	982	0.83	43027568
NG IT-S	0.001094	0.1094	3.2e-05	0.0032	10736	4250	1743	0.000582496	0.0582496	27468	9.35	1	11313	3634	4636	442	1020	0.93	30796778
NG IT-S ∆	-6.41574	-6.41574	-5.88235	-5.88235	-8.87795	-12.1175	-17.4325	-30.2473	-30.2473	-8.24732	-3.80658	-99.9861	2.84545	-6.91598	-0.855432	8.59951	3.86965	12.0482	-28.4255
NG MO	0.001009	0.1009	2.7e-05	0.0027	14509	3441	2253	0.000231046	0.0231046	30297	5.66	0	14203	1303	2210	204	628	0.85	26605534
NG MO-S	0.001012	0.1012	2.9e-05	0.0029	12431	2881	1647	0.000113464	0.0113464	26440	5.41	0	14519	1219	2263	226	687	0.85	26113084
NG MO-S ∆	0.297324	0.297324	7.40741	7.40741	-14.3221	-16.2743	-26.8975	-50.891	-50.891	-12.7306	-4.41696	0	2.22488	-6.44666	2.39819	10.7843	9.3949	0	-1.85093

## Sheet: BR12
	Mismatch rate	Mismatch %	Alignment gap rate	Alignment Gap %	Coverage gap #	ISO #	Conflict #	TypeII rate	TypeII %	Count	N50Mbp	N-content	No hit	>90% coverage #	>1.5 BS #	Median length	N50 Length	RNA-Seq Spearman's	Mappable reads
Mosaik	0.000794	0.0794	6e-06	0.0006	16617	74	256	0.000323341	0.0323341	21649	16.2727	1571541	3865	14208	13880	1343	1849	1	62909068
Mosaik-S	0.000787	0.0787	6e-06	0.0006	16239	69	248	0.00014394	0.014394	20842	16.0836	1490211	4672	14013	13650	1378	1859	1	62073720
Mosaik-S ∆	-0.881612	-0.881612	0	0	-2.27478	-6.75676	-3.125	-55.4834	-55.4834	-3.72765	-1.162	-5.17518	20.8797	-1.37247	-1.65706	2.60611	0.540833	0	-1.32787
Inchworm	0.005193	0.5193	0.000102	0.0102	13503	7031	5823	0.000821787	0.0821787	52325	20.1966	0	6288	11835	9742	337	1620	0.92	58506466
Inchworm-S	0.003789	0.3789	6.1e-05	0.0061	11408	5943	3422	0.000918764	0.0918764	33741	16.4509	0	7092	10735	9363	640	1672	0.92	57798886
Inchworm-S ∆	-27.0364	-27.0364	-40.1961	-40.1961	-15.5151	-15.4743	-41.233	11.8007	11.8007	-35.5165	-18.5461	0	12.7863	-9.29447	-3.89037	89.911	3.20988	0	-1.2094
Trinity-ICB	0.001595	0.1595	4.1e-05	0.0041	10845	5982	866	0.00036723	0.036723	29954	14.1873	0	7652	10009	8944	591	1668	0.88	55630184
Trinity-ICB ∆	-69.2856	-69.2856	-59.8039	-59.8039	-19.6845	-14.9196	-85.1279	-55.3133	-55.3133	-42.7539	-29.754	0	21.6921	-15.4288	-8.19134	75.3709	2.96296	-4.34783	-4.91618
CLC	0.006368	0.6368	0.000165	0.0165	14922	6877	12603	0.00515665	0.515665	204590	26.3095	11970	5773	12149	9533	139	423	0.95	53854190
CLC-S	0.003066	0.3066	7.7e-05	0.0077	12431	4652	7445	0.00307195	0.307195	85939	18.1734	228	6592	10431	9444	153	1253	0.95	55303348
CLC-S ∆	-51.853	-51.853	-53.3333	-53.3333	-16.6935	-32.3542	-40.9268	-40.4275	-40.4275	-57.9945	-30.9243	-98.0952	14.1867	-14.1411	-0.933599	10.0719	196.217	0	2.69089
Velvet	0.004363	0.4363	0.000179	0.0179	11380	2007	11299	0.000652756	0.0652756	45959	22.4933	21303	7551	10032	9191	628	1653	0.91	27603966
Velvet-S	0.002639	0.2639	8.9e-05	0.0089	9424	2715	5399	0.000314059	0.0314059	28657	15.3121	424	8367	9279	8445	793	1652	0.88	26324276
Velvet-S ∆	-39.5141	-39.5141	-50.2793	-50.2793	-17.188	35.2765	-52.217	-51.8871	-51.8871	-37.6466	-31.9257	-98.0097	10.8065	-7.50598	-8.11664	26.2739	-0.0604961	-3.2967	-4.63589
Oases-VO	0.00139	0.139	6.6e-05	0.0066	8733	2868	2139	0.000306145	0.0306145	22865	12.521	383	9607	8062	7571	806	1696	0.79	21866466
Oases-VO ∆	-68.1412	-68.1412	-63.1285	-63.1285	-23.2601	42.8999	-81.0691	-53.0996	-53.0996	-50.2491	-44.3345	-98.2021	27.2282	-19.6372	-17.6259	28.3439	2.60133	-13.1868	-20.7851
SOAPdenovo	0.001229	0.1229	6.3e-05	0.0063	21961	4058	5257	0.000315713	0.0315713	50679	15.267	387338	6181	8575	5936	261	1322	0.78	16266354
SOAPdenovo-S	0.00115	0.115	5.3e-05	0.0053	14467	3169	4293	0.000219353	0.0219353	31912	13.3108	11441	7813	7716	6380	505	1496	0.73	16447778
SOAPdenovo-S ∆	-6.42799	-6.42799	-15.873	-15.873	-34.1241	-21.9073	-18.3375	-30.5212	-30.5212	-37.0311	-12.8131	-97.0462	26.4035	-10.0175	7.47978	93.4866	13.1619	-6.41026	1.11533
ABySS	0.001373	0.1373	3.9e-05	0.0039	12531	1877	3447	0.000734848	0.0734848	31299	14.3728	892	7833	8069	8599	601	1581	0.88	25616462
ABySS-S	0.00128	0.128	3.3e-05	0.0033	10272	1520	2825	0.000592581	0.0592581	25313	13.5914	0	8682	7621	8489	818	1639	0.85	24966966
ABySS-S ∆	-6.77349	-6.77349	-15.3846	-15.3846	-18.0273	-19.0197	-18.0447	-19.36	-19.36	-19.1252	-5.43642	-100	10.8388	-5.55211	-1.27922	36.1065	3.66856	-3.40909	-2.53546
NG IT	0.001453	0.1453	4.4e-05	0.0044	9255	2850	1554	0.00114039	0.114039	24553	10.8408	0	10517	5136	6669	648	1282	0.93	72862166
NG IT-S	0.001313	0.1313	4.1e-05	0.0041	8776	2598	1293	0.000905797	0.0905797	23184	10.563	0	10771	4989	6622	677	1303	0.93	72354176
NG IT-S ∆	-9.63524	-9.63524	-6.81818	-6.81818	-5.17558	-8.84211	-16.7954	-20.5713	-20.5713	-5.57569	-2.56199	0	2.41514	-2.86215	-0.704753	4.47531	1.63807	0	-0.697193
NG MO	0.001166	0.1166	3e-05	0.003	14087	3671	4083	0.000245851	0.0245851	32540	7.55574	0	12761	2300	3775	225	917	0.087	69415816
NG MO-S	0.001138	0.1138	2.9e-05	0.0029	12491	3103	3852	0.000168902	0.0168902	29603	7.36237	0	12947	2228	3826	252	956	0.88	66120038
NG MO-S ∆	-2.40137	-2.40137	-3.33333	-3.33333	-11.3296	-15.4726	-5.6576	-31.2992	-31.2992	-9.02581	-2.55931	0	1.45757	-3.13043	1.35099	12	4.253	911.494	-4.74788

## Sheet: NORM
	Mismatch rate	Mismatch %	Alignment gap rate	Alignment Gap %	Coverage gap #	ISO #	Conflict #	TypeII rate	TypeII %	Count	N50Mbp	N-content	No hit	>90% coverage #	>1.5 BS #	Median length	N50 Length	RNA-Seq Spearman's	Mappable reads
Mosaik	0.000579	0.0579	4e-06	0.0004	16138	61	652	0.000728266	0.0728266	21970	16.5966	1591555	3881	15435	14407	1367	1841	1	38263357
Mosaik-S	0.000572	0.0572	4e-06	0.0004	15708	59	558	0.00047576	0.047576	21019	16.3663	1491976	4752	15194	14151	1405	1853	1	38109869
Mosaik-S ∆	-1.20898	-1.20898	0	0	-2.66452	-3.27869	-14.4172	-34.6722	-34.6722	-4.32863	-1.38748	-6.25671	22.4427	-1.56139	-1.77691	2.77981	0.65182	0	-0.401136
Inchworm	0.015179	1.5179	0.000492	0.0492	12801	2604	19807	0.00158921	0.158921	88094	44.9036	0	5920	13633	11566	608	1891	0.91	39248826
Inchworm-S	0.006928	0.6928	0.000116	0.0116	11264	3002	8555	0.000461593	0.0461593	36829	19.9297	0	6968	12535	10782	858	1774	0.91	38310030
Inchworm-S ∆	-54.358	-54.358	-76.4228	-76.4228	-12.0069	15.2842	-56.8082	-70.9546	-70.9546	-58.1935	-55.6166	0	17.7027	-8.05399	-6.77849	41.1184	-6.1872	0	-2.39191
Trinity-ICB	0.002704	0.2704	7.1e-05	0.0071	10656	3211	3269	0.000347608	0.0347608	28768	14.9782	0	7835	11336	9974	775	1798	0.85	35759571
Trinity-ICB ∆	-82.1859	-82.1859	-85.5691	-85.5691	-16.7565	23.3103	-83.4957	-78.127	-78.127	-67.344	-66.6436	0	32.348	-16.8488	-13.7645	27.4671	-4.91803	-6.59341	-8.89009
CLC	0.005689	0.5689	0.000187	0.0187	15025	4626	23363	0.00289124	0.289124	108604	22.143	52006	5197	13914	11182	159	1244	0.92	34722900
CLC-S	0.003393	0.3393	9.3e-05	0.0093	12569	3050	12708	0.00155856	0.155856	53896	17.5534	4482	6173	12414	11010	207	1591	0.92	35466025
CLC-S ∆	-40.3586	-40.3586	-50.2674	-50.2674	-16.3461	-34.0683	-45.6063	-46.0938	-46.0938	-50.3738	-20.7273	-91.3818	18.7801	-10.7805	-1.53819	30.1887	27.8939	0	2.14016
Velvet	0.007289	0.7289	0.001331	0.1331	9715	896	12648	0.00114644	0.114644	45358	28.7336	67306	7561	10199	10683	1110	1787	0.88	20600484
Velvet-S	0.004112	0.4112	0.000556	0.0556	8618	2227	5041	0.00101424	0.101424	25635	17.281	4248	8367	9558	9174	1221	1795	0.87	19783457
Velvet-S ∆	-43.5862	-43.5862	-58.2269	-58.2269	-11.2918	148.549	-60.1439	-11.5311	-11.5311	-43.483	-39.8577	-93.6885	10.66	-6.28493	-14.1252	10	0.447678	-1.13636	-3.96606
Oases-VO	0.001868	0.1868	0.000299	0.0299	7500	2537	593	0.000680272	0.0680272	17640	12.2811	1590	10819	7825	7693	1266	1890	0.67	14997895
Oases-VO ∆	-74.3723	-74.3723	-77.5357	-77.5357	-22.7998	183.147	-95.3115	-40.662	-40.662	-61.1094	-57.2586	-97.6377	43.0895	-23.2768	-27.9884	14.0541	5.76385	-23.8636	-27.1964
SOAPdenovo	0.056181	5.6181	0.000489	0.0489	57727	15607	66462	0.000120519	0.0120519	531037	38.8371	41570	4037	5896	1169	120	120	0.4	3335035
SOAPdenovo-S	0.038587	3.8587	0.000283	0.0283	41771	9832	40716	7.52744e-05	0.00752744	239125	20.812	2756	4946	2665	1077	120	120	0.33	3191168
SOAPdenovo-S ∆	-31.3166	-31.3166	-42.1268	-42.1268	-27.6404	-37.0026	-38.7379	-37.5414	-37.5414	-54.9702	-46.4121	-93.3702	22.5167	-54.7999	-7.86997	0	0	-17.5	-4.31381
ABySS	0.001307	0.1307	6e-05	0.006	14190	1804	3114	0.00134158	0.134158	30561	14.0047	19922	7889	9072	8313	661	1567	0.86	19581578
ABySS-S	0.001229	0.1229	5.3e-05	0.0053	11139	1464	2425	0.00104021	0.104021	24995	13.255	1041	8673	8303	8226	878	1618	0.85	19346210
ABySS-S ∆	-5.96787	-5.96787	-11.6667	-11.6667	-21.5011	-18.847	-22.1259	-22.4639	-22.4639	-18.2128	-5.35309	-94.7746	9.93789	-8.47663	-1.04655	32.829	3.25463	-1.16279	-1.20199
NG IT	NA
NG IT-S
NG IT-S ∆
NG MO	0.000945	0.0945	5.3e-05	0.0053	24390	3746	1748	0.000443211	0.0443211	42869	8.32739	0	8228	1788	1526	291	437	0.88	23869629
NG MO-S	0.000974	0.0974	4.7e-05	0.0047	17695	2857	1150	0.00026393	0.026393	34100	7.17883	0	9080	1470	1485	310	501	0.82	23060582
NG MO-S ∆	3.06878	3.06878	-11.3208	-11.3208	-27.4498	-23.732	-34.2105	-40.4505	-40.4505	-20.4553	-13.7925	0	10.3549	-17.7852	-2.68676	6.52921	14.6453	-6.81818	-3.38944
